# Supplementary material for: Diabetes-linked transcription factor HNF4α regulates metabolism of endogenous methylarginines and β-aminoisobutyric acid by controlling expression of alanine-glyoxylate aminotransferase 2
Source: PubMed Central journal article supplement (PMC5067591; doi:10.1038/srep35503), 2016-10-18
Supplement: srep35503-s1.pdf [file srep35503-s1.pdf]

Diabetes-linked transcription factor HNF4 $\alpha$  regulates metabolism of endogenous methylarginines and  $\beta$ -aminoisobutyric acid by controlling expression of alanine-glyoxylate aminotransferase 2

**Dmitry V Burdin**<sup>1§</sup>, **Alexey A Kolobov**<sup>2§</sup>, **Chad Brocker**<sup>3</sup>, **Alexey A Soshnev**<sup>4</sup>, **Nikolay Samusik**<sup>5</sup>,  
**Anton V Demyanov**<sup>6</sup>, **Silke Brilloff**<sup>7</sup>, **Natalia Jarzebska**<sup>7</sup>, **Jens Martens-Lobenhoffer**<sup>8</sup>, **Maren Mieth**<sup>9</sup>,  
**Renke Maas**<sup>9</sup>, **Stefan R Bornstein**<sup>10</sup>, **Stefanie M Bode-Böger**<sup>8</sup>, **Frank Gonzalez**<sup>3</sup>, **Norbert Weiss**<sup>7</sup>,  
**Roman N Rodionov**<sup>7\*</sup>

<sup>1</sup> Department of Physiology, Saint-Petersburg State University, 199034 Saint-Petersburg, Russia

<sup>2</sup> Department of Biochemistry, Saint-Petersburg State University, 199034 Saint-Petersburg, Russia

<sup>3</sup> National Cancer Institute, NIH, Bethesda, MD, 20892, USA

<sup>4</sup> The Rockefeller University, New York, NY, 10065, USA

<sup>5</sup> Stanford University School of Medicine, Stanford, CA, 94305, USA

<sup>6</sup> Institute of Highly Pure Biopreparations, 197110 Saint-Petersburg, Russia

<sup>7</sup> University Center for Vascular Medicine, Technische Universität Dresden, 01307 Dresden, Germany

<sup>8</sup> Institute of Clinical Pharmacology, Otto-von-Guericke University, 39120 Magdeburg, Germany

<sup>9</sup> Institute of Experimental and Clinical Pharmacology and Toxicology, Friedrich-Alexander-University Erlangen-Nürnberg (FAU), 91054 Erlangen, Germany

<sup>10</sup> Department of Internal Medicine III, University Hospital Carl Gustav Carus, Technische Universität Dresden, 01307 Dresden, Germany

§ These authors contributed equally to this work

\* To whom correspondence should be addressed : Roman N. Rodionov, MD, PhD, University Center for Vascular Medicine, University Hospital "Carl Gustav Carus", Technische Universität Dresden, Fetscherstraße 42, 01307 Dresden, Germany, Phone: +49-351-458-3659, Fax: +49-351-458-4359, E-mail: [Roman.Rodionov@uniklinikum-dresden.de](mailto:Roman.Rodionov@uniklinikum-dresden.de)

| Name                         | Sequence (5'-3')                     | Source            |
|------------------------------|--------------------------------------|-------------------|
| Cloning                      |                                      |                   |
| End F                        | GCTCTCGAGGCCTCCATTTTTCTCATTATTTAAGGT |                   |
| End R                        | ACAAAGCTTCTCTTCCCAGGCAGAAAGAA        |                   |
| Mut 1 F                      | TCTTCTAATATCAAAGTCGAGTCCAGTCAGTGAGC  |                   |
| Mut 1 R                      | GCTCACTGACTGGACTCGACTTTGATATTAGAAGA  |                   |
| Mut 2 F                      | TCTTCTAATATCTCAGTCGAGTCCAGTCAGTGAGC  |                   |
| Mut 2 R                      | GCTCACTGACTGGACTCGACTGAGATATTAGAAGA  |                   |
| Mut 3 F                      | TCTTCTAATATAGCCTTCGAGTCCAGTCAGTGAGC  |                   |
| Mut 3 R                      | GCTCACTGACTGGACTCGAAGGCTATATTAGAAGA  |                   |
| Mut 4 F                      | TCTTCTAATCAAGCCTCAGAGTCCAGTCAGTGAGC  |                   |
| Mut 4 R                      | GCTCACTGACTGGACTCTGAGGCTTGATTAGAAGA  |                   |
| qPCR for mRNA quantification |                                      |                   |
| Agxt2 F                      | sequence not enclosed                | Qiagen QT01557682 |
| Agxt2 R                      | sequence not enclosed                | Qiagen QT01557682 |
| Hnf4a F                      | AGAAGATTGCCAACATCAC                  |                   |
| Hnf4a R                      | GGTCATCCAGAAGGAGTT                   |                   |
| Hnf4a F2                     | AGAAGATTGCCAACATCAC                  |                   |
| Hnf4a R2                     | GGTCATCCAGAAGGAGTT                   |                   |
| Ddah1 F                      | CTACGCAGTCTCTACAGT                   |                   |
| Ddah1 R                      | TCATAACGATGGTCACTCA                  |                   |
| Ddah2 F                      | AAAGCAGTCAGGGCAATG                   |                   |
| Ddah2 R                      | CCAGGACGCAGAAAGAGA                   |                   |
| HPRT F                       | CTTTGCTGACCTGCTGGATTAC               |                   |
| HPRT R                       | ATCCAACACTTCGAGAGGTCC                |                   |
| Gclc F                       | CTACCACGCAGTCAAGGACC                 | 1                 |
| Gclc R                       | CCTCCATTCAAGTAACAACACTGGAC           | 1                 |
| RpL13 F                      | ATCCCTCCACCCTATGACAA                 |                   |
| RpL13 R                      | GCCCCAGGTAAGCAAACCTT                 |                   |
| qPCR for ChIP analyses       |                                      |                   |
| Exp 1 F                      | AAGTCCATTTATAGTCAGCAGTCT             |                   |
| Exp 1 R                      | CTGTGGAAGCAGGTCAGC                   |                   |
| Exp 2 F                      | CCCAAGTCCATTTATAGTCA                 |                   |
| Exp 2 R                      | TCCAGGCTAGAGACATC                    |                   |
| Neg 1 F                      | CGTGGTTGTTACTAAGTGTGTTCA             |                   |
| Neg 1 R                      | TGGTATGTGCTCATTCTTGTCTCA             |                   |
| Neg 2 F                      | CATCTGTCTTGCTCAGTTCTT                |                   |
| Neg 2 R                      | GCTGTTGTGTAGTGCTCTC                  |                   |
| Pos 1 F                      | CAAGGCTGAAGTCCAAAG                   | 2                 |
| Pos 1 R                      | CTGCTCTGTTTACATTGGA                  | 2                 |

**Supplementary Table S1. Sequences of PCR and cloning primers used in work.** Primers, for which the source is not specified, were self-designed.

References:

1. Patwardhan, R. S., Checker, R., Sharma, D., Sandur, S. K. & Sainis, K. B. Involvement of ERK-Nrf-2 signaling in ionizing radiation induced cell death in normal and tumor cells. *PLoS One* **8**, e65929 (2013).
2. Cozzolino, A. M. *et al.* TGF $\beta$  overrides HNF4 $\alpha$  tumor suppressing activity through GSK3 $\beta$  inactivation: implication for hepatocellular carcinoma gene therapy. *J. Hepatol.* **58**, 65–72 (2013).
